# Supplementary material for: Isovalent electronic systems B+13 and BeB12: structural interchange of GM and TS
Source: Royal Society of Chemistry journal article supplement (doi:10.1039/d3cp03433j), 2023-01-01
Supplement: d3cp03433j1.pdf [file d3cp03433j1.pdf]

## SUPPLEMENTARY INFORMATION

### Isovalent electronic systems $B_{13}^+$ and $BeB_{12}$ : Structure interchange of GM and TS

Ceng Zhang,<sup>a</sup> Hai-ru Li,<sup>\*a</sup> Rui-Hua Zhou,<sup>a</sup> Yan Zhang,<sup>a</sup> Xiong-Bo Duan<sup>\*b</sup>

<sup>a</sup> School of Materials Science and Engineering, North University of China, Taiyuan,  
030051, China.

E-mail: [lihairu@nuc.edu.cn](mailto:lihairu@nuc.edu.cn)

<sup>b</sup> School of Energy Science and Engineering, Central South University, Changsha  
410083, China.

E-mail: [xiongbo\\_duan@csu.edu.cn](mailto:xiongbo_duan@csu.edu.cn)

## SUPPLEMENTARY INFORMATION – PART

**Figure S1.** Optimized structures of the  $C_s$  global minimum (GM) and  $C_s$  transition state (TS) of  $\text{BeB}_{12}$  at PBE0/6-311+G(d) level. The bond distances are indicated in Å

**Figure S2.** NBO charge analysis of the global minimum(GM) and rotational transition state(TS) structures of  $C_s$   $\text{BeB}_{12}$  clusters

**Figure S3.** Molecular dynamics simulation curves of GM structure at 1500 K and 2600 K

**Table S1.** Cartesian coordinates for the global-minimum (GM) structure and transition states (TS) at the PBE0/6-311+G (d) level.

**GIF1:** A GIF extracted from the BOMD simulation for  $C_s$   $\text{BeB}_{12}$ .

**Figure S1.** Optimized structures of the  $C_s$  global minimum (GM) and  $C_s$  transition state (TS) of  $BeB_{12}$  at PBE0/6-311+G(d) level. The bond distances are indicated in Å

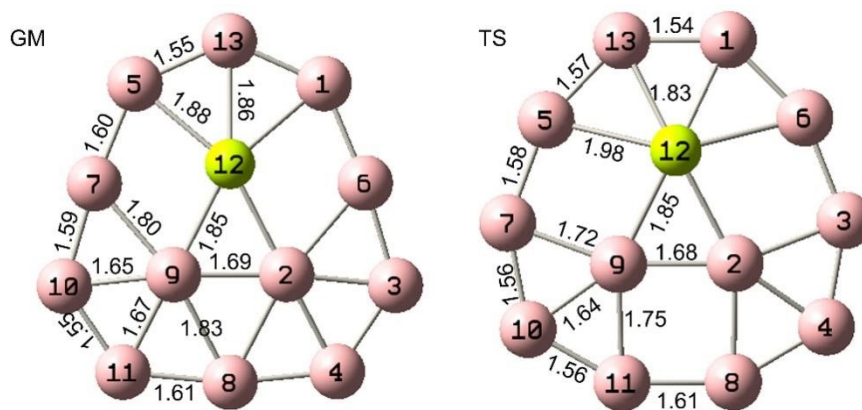

**Figure S2.** NBO charge analysis and WBIs of the global minimum(GM) and rotational transition state(TS) structures of  $BeB_{12}$  clusters

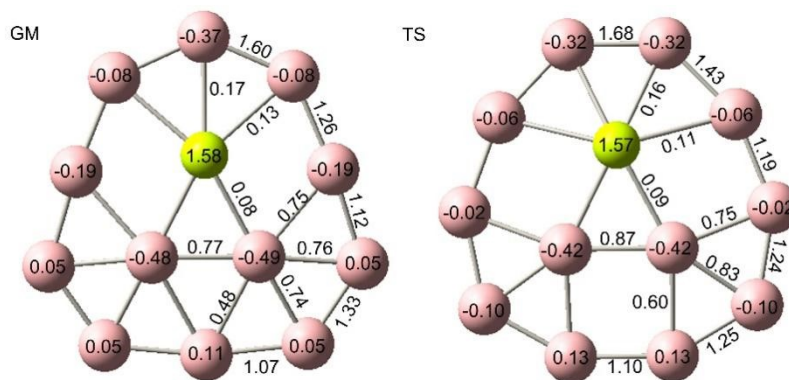

**Figure S3.** Molecular dynamics simulation curves of GM structure at 1500K and 2600K.

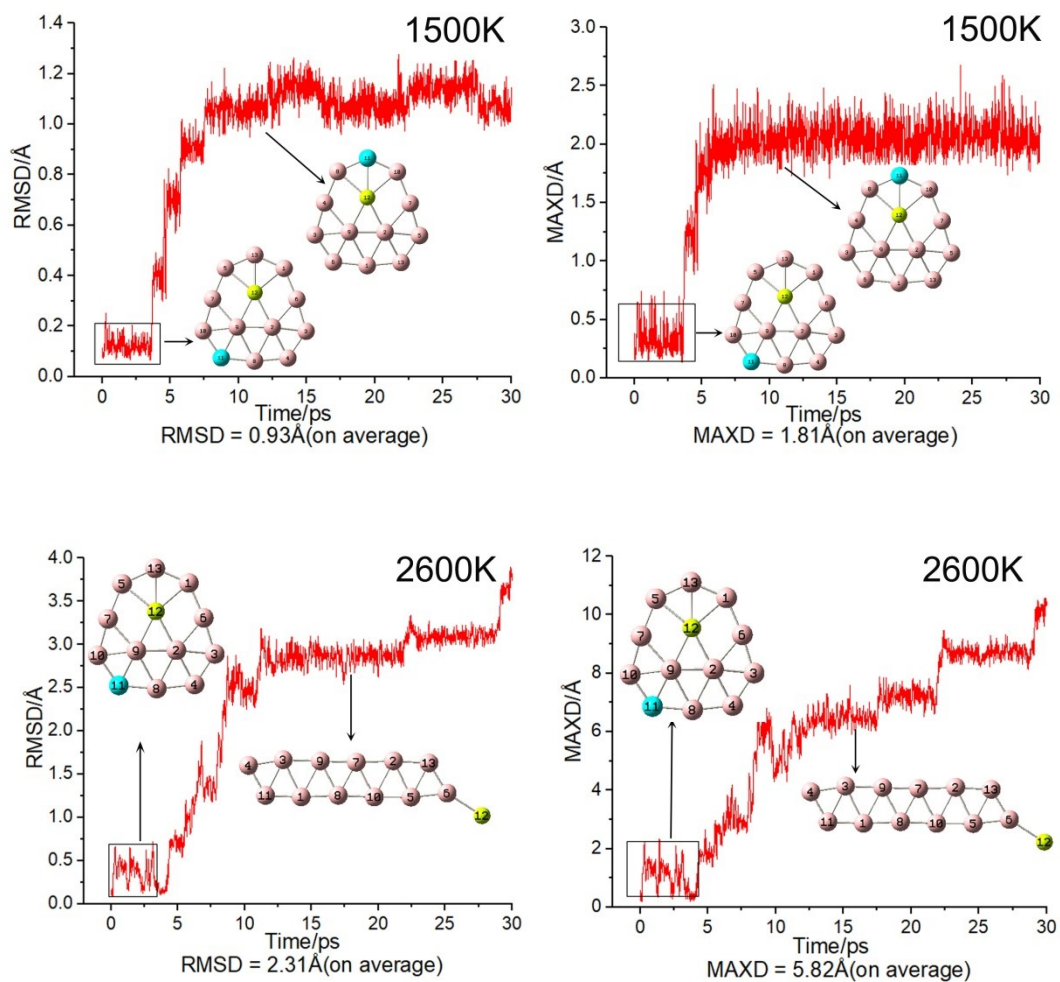

**Table S1.** Cartesian coordinates for the global-minimum (GM) structure and transition states (TS) at the PBE0/6-311+G(d) level.

(a) GM of  $C_s$  BeB<sub>12</sub>

|    |             |             |             |
|----|-------------|-------------|-------------|
| B  | 0.08100400  | 2.18231700  | 1.40790600  |
| B  | -0.19379300 | -0.64612400 | 0.84368300  |
| B  | 0.06175200  | -0.82134000 | 2.46680500  |
| B  | 0.09740100  | -2.10146400 | 1.59843800  |
| B  | 0.08100400  | 2.18231700  | -1.40790600 |
| B  | -0.00835500 | 0.70453300  | 2.01955400  |
| B  | -0.00835500 | 0.70453300  | -2.01955400 |
| B  | 0.05626600  | -2.25576600 | 0.00000000  |
| B  | -0.19379300 | -0.64612400 | -0.84368300 |
| B  | 0.06175200  | -0.82134000 | -2.46680500 |
| B  | 0.09740100  | -2.10146400 | -1.59843800 |
| Be | -0.28758000 | 1.00046700  | 0.00000000  |
| B  | 0.09778000  | 2.81955000  | 0.00000000  |

(b) TS of  $C_s$  BeB<sub>12</sub>

|   |             |             |             |
|---|-------------|-------------|-------------|
| B | 2.59633800  | -0.77021000 | -0.12923400 |
| B | -0.60653700 | -0.84093900 | 0.25234900  |
| B | -0.01134200 | -2.42999900 | -0.04050700 |
| B | -1.54191200 | -2.14826400 | -0.08962100 |
| B | 1.46980800  | 1.86225300  | -0.05772900 |
| B | 1.46706900  | -1.86386200 | -0.05714500 |
| B | -0.00813400 | 2.42965600  | -0.04031900 |
| B | -2.32215700 | -0.80111900 | -0.11005500 |
| B | -0.60544000 | 0.84156000  | 0.25222900  |
| B | -1.53920300 | 2.15020300  | -0.08929200 |

|    |             |             |             |
|----|-------------|-------------|-------------|
| B  | -2.32106400 | 0.80408200  | -0.10979900 |
| Be | 1.03140400  | -0.00040000 | 0.43581100  |
| B  | 2.59745200  | 0.76696000  | -0.12952600 |

**GIF1:** A GIF extracted from the BOMD simulation for BeB<sub>12</sub>

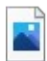

BeB12.gif
